# Supplementary material
Source: MDPI journal article supplement (https://www.mdpi.com/2075-163X/10/12/1073)
Supplement: s1 [file s1]

## Sheet: Sheet1
Table S1. Papers dealing with clay minerals at the PETM interval, following chronological order. The main features of the studied sites, methods, mineralogical results and data interpretations are reported. Abbreviations: Chl = chlorite, CIA = Chemical Index of Alteration; D = domain (c = continental, m = marine); Ilt = illite, m/c = marine (m) or continental (c) materials; ML = mixed layers illi…
R, D	PETM Identification	Location, Lithology, Sampling Features	Grain-Size Fraction	Clay Minerals Data Reported	Kaolinite Variations at the PETM Base	Kaolinite Pulse during the Recovery	Other Features of Clay Minerals		Physico-Chemical Features for Climatic/Provenance Study	Provenance-Oriented Interpretation of the Clay Assemblage	Climate-Orented Interpretation of the Clay Assemblage	Notes	R
39, m	δ13C, δ18O, biostratigraphy	Crimea - Clay and silty-clay sediments, with sporadic sandy and marly interlayers; low resolution sampling for clay minerals data	<1µm	XRD traces	Kln significantly increase only within the PETM		ML dominates				Sea level fluctuations provide conditions favourable for the authigenic formation of clay minerals, which are climatic indicators		39
40, c	δ13C (organic matter and carbonates), precise PETM identifications is problematic	Argentina (NW) - Soils developd on continental sediments	<2µm	clay assemblage, Kln/Ilt, Kln/ML	A gradual increase in Kln begins slight below the presumed PETM onset and reaches maximum values before a sharp return to low concentrations which correspond to a formational limit and end of the PETM		Ilt dominates before the PETM and strongly decrease within it		Textural study (SEM) enabled to identify the pedogenic origin of Kln and Sme		Pedogenic clay minerals are robust paleoclimate proxies (not affected by diagenetic changes). Kln/Ilt were correlated with changes in paleotemperature and mean annual precipitation	Significant oscillations of Kln/Ilt indicate short-lived hyperthermals	40
22, m	δ13C (organic)	North Sea - Claystone with turbiditic sandstones, occasional thin ash layers (well 22/10a-4). High resolution sampling	<4µm	clay assemblage, Kln/Ilt, Kln/ML	Significant increase of Kln/Ilt and Kln/ML during PETM onset and gradual return to pre-PETM values within the PETM core	Possible (by inspection of the Kln/Ilt curve)	ML always abundant, Chl occur mainly before the PETM onset; increase of Kln and decrease of ML is detectable in figure 6		The crystal order of the Kln-rich samples (XRD peak width) indicates more adv-anced diagenetic development than the typical pedogenic Kln	The Kln augmentation al the PETM onset is more likely to be explained by enhanced fluvial erosion of the pre-existing Kln bearing materials		The XRD peak widths for the Kln-rich samples is consistent with diagenetic materials rather than poorly crystalline forms typically produced during pedogenesis	22
41, c	δ13C (organic, black carbon, carbonates), biostratigraphy	Central China - Lacustrine carbonate sediments	<2µm	clay assemblage, Kln/Sme	Pulse of Kln and Kln/Sme at the PETM onset followed by gradual, scattered decrease		Sme and Ilt are the most abundant minerals, Chl disapears during the PETM onset		Paleotemperature proxy based on branched tetraethers and the methylation index of branched tetraethers; CIA; salinity proxies: authigenic dolomite/ calcite, Mg/Ca, Sr/Ca		Clay minerals abundance drive regional information on paleoclimate, and Kln/Sme further support increased precipitation	The response of the hydrological cycle is strongly dependent on the geographic position and climate zone	41
11, m	δ13C [31]	Italy (NE)	<2µm	original data from [31]	no	no	A slight pulse in Chl at the PETM base is emphasized		Higher plant n-alkane average chain length and the Chl pulse suggest wet climate and invigorated physical erosion respectively; organic biomarkers		The significance of clay minerals as climatic proxy is problematic, but the increase in Chl agrees with other indicators of enhanced hydrological cycle and physical erosion	The cyclic variations of hematite (bulk), not paired by other minerals, suggest a different vector of supply, possibly eolian, as hematite is typical of almost arid climate	11
24, m	δ13C (organic, carbonates), δ15N, biostratigraphy	Egypt (Dababiya NW) - Clays to marls filling of an outer shelf to marginal marine channel; 5 lithologic beds with erosional sequence boundary at the base (incomplete PETM sequence), 2 anoxic episodes	<2µm	clay assemblage, Kln/Sme, Kln/Ilt, Kln/(Ilt+Chl)	Kln is stable, but a Sme pulse occurs in bed 1 (ML decrease)	no	Kln pulse in bed 2 (upper anoxic episode), whith Ilt, Chl, ML, Plg		Some mineralogical and chemical data (including CIA) are interpreted in climatic terms considering the whole data set (sedimentologic, isotopic, paleontologic, ...)	The higher Kln in bed 2 is most likely of detrital origin, since clay minerals shows the same variations as Chl, Plg, and ML	The CO2 derived from methane oxidation in atmosphere contributes to greenhouse gases, resulting in hot humid conditions and high precipitation that increased Kln		24
42, m	δ13C (organic), biostratigraphy, magneto-stratigraphy	Spain (Pyrenees) - shallow marine (compared to basin floor deposits)	<2µm	Kln, clay assemblage	The precise attribution to the PETM of the studied successions is critical, but a clear increase of Kln is recorded for PETM core intervals		Only Kln and Ilt occur in the PETM interval, Sme occur before and after the interval tentatively attributet to PETM core		The occurrence of calcareous nodules and gypsum in paleosols of the area indicates semiarid to arid climates and the rise in temperatures during the PETM	The Kln reflects the erosion of thick Cretaceous lateritic profiles developed on the Hercynian basement		Kln can be used a correlation tool	42
43, m	δ13C and δ18O (foraminifera), biostratigraphy	North Atlantic - Laminated calcareous nannofossil chalks, clay-rich unit and calcareous nannofossil chalks again (DSDP Site 401); low resolution sampling for clay minerals data	<2µm	clay assemblage	gradual increase of Kln and Chl starts in the PETM interval	Continuous increase	Sme is the main mineral that decreases when Kln and Chl increase; Ilt rather constant			The need for a provenance change able to account for both Kln and Chl increase agrees with: i) increased erosion of Kln-bearing clays on the adjacent continent, and (ii) a long-term change in the source of clays associated with the PETM onset		The lack of a discrete pulse of Kln in contrast to terrestrial 4He and the planktic foraminiferal δ18O, suggests increased erosion of Kln-bearing clays and a long-term change in the source of clays	43
44, m	δ13C (organic carbom carbonates), biostratigraphy	Egypt (Sinai) - Upper bathyal sediments, compared with Dababija area sections; condensed clay rich layer at the base represents a hiatus with the lowermost part of the PETM missing	<2µm	clay assemblage, Kln/Sme, Kln/Ilt, Kln/(Plg+Sep)	Kln increases just below the PETM, maximum values near the lightest δ13C values and return to pre-PETM values with the PETM interval	Kln/(Sep + Plg) varies but remains higher then pre-PETM values during recovery	Kln, Sme, Ilt, Sep and Plg occur. Sme with low values at the PETM onset, followed by a gradual increase up to 80%		Weathering Index of Parker, CIA, Chemical Index of Weathering		Kln/Sme and Kln/(Sep + Plg) can be used as climatic signals. Also the coinciding high values of Ilt and Sep+Plg indicates semi-arid climate	The occurrence of low amounts of Sep and Plg could be missed using poor accurate deconvolution software	44
29, m	δ13C	New Jersey - Near shore sediments without carbonate dissolution but strong decrease in sand and increase of clay and silt	<2µm	clay assemblage	Strong increse of Kln at the PETM onset and core and sudden return during recovery, not coupled with grain-size change	Higher Kln valus are reported in the upper PETM core and a bit further	Sme and Ilt changes inversely respect to Kln, but Ilt to much lesser extents			The origin of Kln is addressed specifically, also considering amount and isotopic signature of carbonates, organic carbon, particulate organic carbon and mineral-bound organic carbon. Kln origin remains uncertain, possibly because during the PETM environmental conditions were peculiar, suggesting a change in composition and provenance of clays in response to changing of continental weathering and…		A decoupled responses of continental and marine systems is envisaged involving also clay minerals relationships with mineral-bound inorganic nitrogen	29
25, m	δ13C, biostratigraphy, lithology	Egypt (central) - Similar to Dababija [28], about 250 Km far; 5 PETM beds: i) laminated shale with few P-nodules, ii) laminated shale with some fish remains and P-nodules, iii) moderately to highly calcareous marl, iv and v) calcareous marls. Low resolution for clay minerals sampling	bulk, <2µm	XRD traces of the < 2µm fraction								The qualitative representation of clay minerals in the <2µm fraction prevent full evaluation of their significance; some pulse of the Kln XRD peak is detectable at the base PETM and during recovery	25
45, m	δ13C (organic), cyclostratigraphy	Svalbard - Laminated shales (core BH 9/05). Low resolution for clay minerals sampling in the recovery	bulk	Kln/Chl, Kln/Ilt, Ilt, Chl, Kln (in the bulk)	Kln/Ilt and Kln/Chl increase at the PETM onset				187Os/188Os, CIA, Na/Ti, Sme crystal ordering (as FWHM)		The hypothesis of increased intensity of chemical weathering is supported by chemical and isotopic parameters, and in agreement with a significantly higher Sme FWHM observed in the same area [49]	The significance of clay minerals is not discussed, but two pulses of the Kln/Chl and Kln/Ilt are detectable from the figures and coincident with weathering-correlated parameters	45
46, m	δ13C (organic, carbonates), biostratigraphy	New Jersey - ODP site 174AX “Bass River”; glauconite-rich sand to silts (Paleocene), to more clay-rich sediments (up to Lower Eocene). See also [60]	<2µm	Kln/Sme	Kln/Sme ratio increases 40 cm below the core PETM, peaking in the next 2–3 m and returning to pre-PETM values within the PETM interval		Ilt is relatively constant, while Kln and Sme dominate the mineral assemblages and are anticorrelated		TEX86	The δ18O (clays) of studied samples and of Cretaceous Kln, enables to model the detrital supply; the long time-lag for to develop lateritic soils and the abundance of Cretaceous Kln deposits fit the scenario of increased physical erosion as cause of the Kln abundance at the PETM		The Kln/Sme curve is rather parallel to the TEX86 curve and follows an antithetical pattern to the δ18O (clays) curve	46
47, m	δ13C (foraminifera, n-alkanes), biostratigraphy	Tanzania - TDP Site 14, mainly claystones and clayey siltstones deposited in a bathyal outer shelf or upper slope setting; only the basal part of the PETM was sampled	bulk	Kln, Ilt, Sme	Kln increases during PETM onset and then remains stable		Ilt shows a single high values in the PETM core, whereas Sme is scattered within a very narrow range of values		D of higher plant leaf wax components, in particular n-alkanes	The coeval increase in Kln and in other detrital products, including quartz and detrital element ratios may support increased erosional power, increased erosive energy in the regional hydrological cycle, stripping away more Kln beds			47
48, m	δ13C (organic)	North Sea – Core 22/10a-4, fissile; claystone with turbiditic sandstones, occasional thin ash layers (only claystones were sampled); only the basal part of the PETM was sampled; clay minerals data with low resolution respect to δ13C	clay fraction, (data from Knox, 1996)	Kln	Kln increase around the onset PETM		see [23]			Considering the long time needed to develop Kln in soils, the Kln increase at the PETM would be coincidental and parallel to the low salinity dinoflagellate, terrestrial C/N ratio, in agreement with elevated runoff			48
49, m	δ13C (organic), biostratigraphy	Svalbard - fine-grained clastic sediments without carbonates; a 15m thick pyritic/jarositic black mudstone represents most of the PETM	bulk, <2µm	Kln, Kln/quartz, Sme FWHM	Kln and Kln/quartz decrease at the PETM onset and follow the parallel variation of the δ13C curve along the whole section	Possible, both Kln and Kln/quartz increase (by figure inspection)	Sme abundance increases within the δ13C excursion; Sme peak width have maximum values for very negative δ13C values				Intensified hydrolysis at source may have produced the expansion of the Sme 001 peak, however a change in sediment source cannot rule out	Variations of the Kln/quartz ratio may be explained by increased distance from source resulting in differential settling of Kln particles, as for the offshore of the Amazon	49
27, m	see [28]	Egypt (Dababiya) - Dababiya Quarry Member (DQM); 5 PETM beds: i) clay bed; ii) bone-bearing shale; iii) coprolite-rich shale; iv) grey shale; v) calcareous marl with calcarenitic bed	bulk, clay fraction (from [28])	Kln, ML, % Sme in ML (from [28])	An abrupt pulse of Kln occurs in bed 2-3 (core PETM, lowest δ13C values)	A continuous increase in Kln begins in bed 4	the Kln pulse in bed 2-3 correspond to pulse of Chl-Sme mixed layer and of % Ilt in ML (also Ilt increases, not shown)					This striking clay mineral pulse is associated with an important lithologic change from detrital to more bio-derived material, as shown by the abrupt rise in carbonate and in apatite content. The increase in biological productivity may be related (more likely) to an increase in the flux of nutrients because of an enhanced hydrological cycle. No signs of cometary impact or basaltic volcanism	27
26, m	δ13C (organic)	Egypt (Dababiya) - DBH section; unconformity (erosive) at the base PETM. 5 beds: i) dark non-calcareous laminated shale, rare phosphate nodules (base); ii) phosphatic brown laminated calcareous shale, some fish debris; iii) brown, laminated phosphatic and calcareous shale with coloured phosphate nodules, some fish remains; iv) calcareous bioturbated shale; v) calcarenitic marlstone rich in plankt…	bulk, <2µm	XRD traces of the < 2µm fraction	No Kln increase at the PETM base slight and episodic (1 sample) increase in Kln at the transition bed 1-2, near the culmination of C values and anhydrite occurrence (bulk)		Variation of clay minerals (bulk) at the very base of bed1 (strong increase in ML, very minor Chl, pyrite; Kln is constant), and at the transition bed1-2 (increase in Kln, Chl, decrease ML). The XRD traces (glycolized) show variations of the ML peak (higher for most of the bed 1 and bed 3), a small peak of Chl and/or Kln at the transition bed1-2			Since the time to develop thick soils would probably be too long, the ML increase at the PETM base marks an abrupt change in the source area or transportation system, also considering that volcanic contribution to the studied sediments was not found	The FWHM of Sme or ML is considered compatible with a massive weathering overprint	The possible erosive uncorformity at the base of bed 1 prevents accurate evaluation of the PETM onset, moreover the transition between bed1-2 (where several compositional features occur) is interpreted as a condensed interval, mainly based on chemical data, which complicates the picture.	26
												The very base of bed 1 is identified as a peculiar interval (possibly a separate lithological event)
50, m	different methods (personal comunications reported in the paper)	Svalbard - Nordenskiöldfjellet section and Borehole BH 9/05; shales under dominantly reducing sea floor conditions, with well developed parallel lamination (pyrite-rich, presence of siderite). Low resolution sampling for clay minerals in the Nordenskiöldfjellet section	bulk, clay fraction	Kln/(Kln+Chl), Kln/(Kln+Ilt) (bulk); Kln/(Kln+Chl) (clay fraction)	BH9/05: increased amounts of Kln (and reported ratios) strongly marks the PETM interval and rapidly return to lower values (bulk); also for the clay fraction the values are high in the entire PETM interval, with a further maximum in the central part	Possible (by figure inspection)	Ilt and Chl dominate the clay fraction				Underlying stratigraphical units are not enriched in Kln, so the Kln increase at the PETM most likely represents weathering products developed for increased precipitation and temperature. Despite the long time requested for Kln formation in soils, extreme temperatures and precipitation in the PETM increased the rate of weathering of Mesozoic sediments (rich in Sme and ML in the area) to the extre…	No signs of authigenesis was detect for clay minerals by SEM observations	50
51, c	δ13C, magnetostratigraphy	Texas - Red and black paleosols	bulk (XRD traces), <2µm	clay assemblage	One of the three soils within the PETM has quite higher amount of Kln (17%) compared to all other samples (pre and post PETM)		ML dominate the clay assemblage, some Ilt occur at trace amounts in many samples, Kln is always quantified (0.3 to 2.1%)		CIA		The increase in Kln at PETM is interpreted to be pedogenic, and there is no evidence suggesting a change in soil parent material. An increase in water and CO2 in the weathering zone would increase the amount of carbonic acid in the soil and decrease soil pH to cause the pedogenic alteration of Sme to Kln. The transformation of Sme to Kln has been reported for laboratory experiments at room temper…		51
31, m	δ13C (carbonates), biostratigraphy	Italy (NE) - Lithological intervals: i) Paleocene marlstone; ii) a thin marl with partial carbonate dissolution; iii) a black clay (0.2-0.3 cm thick) devoid of carbonates and possibly representing a pulse of anoxia and the PETM base; iv) laminated greenish gray marl clays; v) green and reddish marls with gradual increase of carbonates; vi) reddish marl-limestone couplets (recovery)	bulk, <2µm	clay assemblage	Kln decreases gradually before the PETM, but it re-appear in a single sample at the PETM base (the black clay)	no	ML dominates; a slight pulse in Chl at the PETM base is balanced by ML decrease					The cyclical variations of hematite in the bulk sediment (and other parameters) enabled to recognize 5 precessional cycles in the PETM core and 6 into the recovery	31
52, c	tentative identification	North Dakota - Soils on continental sediments including the "orange zone": a terrestrial weathering profile formed by intense pedogenesis; the succession above and below contains coal and lignite beds	clay fraction	Sme/Kln	A prominent increase in Kln/Sme occurs just below the orange zone and remains stable up to the middle part of it, a slight decrease in the upper part is followed by return to dominant Sme values of the Kln/Sme ratio		The samples contain variable amounts of Kln, Ilt and Sme				The overwhelming abundance of Kln and near absence of accessory minerals within the orange zone argue against a detrital origin, and no extensive Kln-rich sources are known within the underlying Cretaceous and Paleocene deposits	A pedogenic origin for the Kln in the orange zone reflects the transition from a weakly developed alluvial paleosols to a more intensely weathered wetland paleosols similar to modern Ultisols, with acidic conditions favouring Kln formation	52
53, m	δ13C, biostratigraphy	Egypt (Dababiya) - Over the unconformity (top Paleocene) 5 PETM beds (transgressive system): 1 dark laminated non-calcareous clay, a few phosphatic coprolites (base); 2 phosphatic brown shale (coprolites, increasing carbonates); 3 light laminated phosphatic shale; 4 grey shale with increasing carbonates; 5 marly calcarenitic limestone (maximum flooding)	bulk, <2µm	clay assemblage		A continuous increase in Kln begins in bed 4, not accompanied by Ilt or Chl (as in bed 2); it is interpreted as a weathering evolution	The clay mineral association is dominated by ML; in bed 2 the pulse ok Kln occurs with Ilt, Chl and Chl-Sme mixed layer and the % Sme in ML			Bed 1 and 2: the clay almost certainly originates from smectitic soils and/or Sme–Chl sediments in poorly drained landscapes. Pulse of quartz may correspond to different areas: a crystalline basement would agrees with cho. Bed 2-3: The pulse of Kln, Chl, Ilt, Chl-Sme originates from different areaa and appears to be linked to an erosion wave triggered by the sea-level fall and climate change in t…		A very detailed interpretation of the clay minerals significance is proposed, and the paper mentions also a clear warning: "Paleoenvironmental implications based on clay minerals should be made carefully and preferably in combination with other proxies"	53
						during the climatic optimum
54, m	A detailed identification of the PETM was beyond the aim of the paper, but interesting features are reported	North Sea - The paper reviews the clay mineral stratigraphy through a wider time interval then the PETM	variable from <0.2µm to <5µm	clay assemblage	Kln enrichment in the lower part of the Early Eocene					The large Sme content is attributed primarily to the alteration of volcanic ash. Other clay minerals are largely detrital in origin and sourced from areas to the west, with reworking of laterites developed over Cornish granites	Kln enrichment in the lower part of the Early Eocene is not associated with deep-water but with condensed hemipelagites. Since this coincides with the peak of Tertiary climatic warming as identified from oxygen isotope studies, Kln may derive from tropical soils developed on land areas to the south		54
35, m	δ13C and δ18O (carbonates), biostratigraphy	Antarctica - ODP Site 690, lower bathyal to upper abyssal paleobathymetry	<2µm	Kln [from Robert 1994]	not investigated	a prominent peak in the abundance of Kln coincides with the A. subsphaerica acme, in the PETM recovery					The coincidence of peak Kln abundances, coccolithophore carbonate sedimentation, and the A. subsphaerica acme, all within the PETM recovery, constitute compelling evidence for a direct relationship between intensified chemical weathering/runoff on the continents and enhanced carbonate sedimentation in the ocean	A double mechanism of carbon sequestration is proposed: the weathering on the continental area (first sink) enhances the supply of nutrients to the ocean that triggers the productivity of carbonate organisms accumulated in the oceans (second sink)	35
19, m	δ13C (carbonates), biostratigraphy	Austria - Untersberg section; about 5.5 m of red and green claystone (corresponding to the PETM) are intercalated in grey and brick-red marlstone with very rare turbiditic siltstone beds	bulk, <2µm	clay assemblage	A clear pulse of quartz/sheet silicates ratio at the PETM base, without changes in the clay mineral association		The succession is strongly dominated by Sme followed by Ilt, whereas Kln and Chl are on average below 10%				Considering the climatic model of pedogenic clay minerals, the clay mineral record at Untersberg suggests subtropical climatic conditions		19
55, c, m	The identification of PETM in sections with clay mineral analyses is very critical	Mississippi, Alabama - Continental to shallow marine sediments	<2µm	Kln	Changes in Kln abundances are restricted to a confined interval in the upper Tuscahoma Formation (2 different cores) but the interval is probably significantly greater in duration than the PETM							The significance of the strong Kln variation are not clearly interpreted as climatic or transport mechanisms, nevertheless Kln variations fits changes in sporomorph relative abundance, whereas the first occurrences of Eocene immigrants that do not correlate strongly with Kln variations	55
56, m	δ13C (organic), biostratigraphy	Egypt (Qreiya) - Similar to Dababija, 5 beds defined (see [28]), about 110Km far, but with a finely granular texture, possibly representing fecal pellets; the base of the PETM succession is sharply defined; low resolution sampling	unknown	clay assemblage	Kln shows the most consistent and sustained increase in beds 1, 2 and 3		ML dominates, Ilt usually <10% and Chl at trace level or absent; 2 anomalous samples for high vermiculite and absence of ML, or for appearance of Chl-Sme mixed layers			The sample with vermiculite is also associated with the highest Ilt and Kln values: this distinctive mineral composition suggests increased supply of land-derived clay			56
28, m	δ13C (organic), biostratigraphy	Egypt (Dababiya, P/E GSSP site) - Shallow water (150-175m); typical division into 5 beds; 1: dark laminated non-calcareous clay, a few phosphatic coprolites (base); 2: phosphatic brown shale, coprolites, increase in carbonates; 3: cream laminated phosphatic shale, sparse coprolites, numerous phosphate inclusions, weathering products of pyrite nodules at the base; 4: grey shale, increasing carbona…	bulk, <2µm	clay assemblage	Striking pulse of Kln in bed 2, associated with an important lithologic change from detrital to more bio-derived material and correlative with lightest δ13C values.	Kln progressively increases in the upper part of bed 4 and continues to rise in bed 5 and even more upward	The Kln pulse in bed 2 corresponds to prominent increase in Ilt, Chl, irregular Chl-Sme mixed layer and % Ilt in ML			Two superimposed patterns of clay mineral variations (long-term and short-term). The first (longer then the PETM) is probably driven by paleogeographic (s.l.) constraints and affects detrital clay minerals (Chl, Ilt, ML...) or Sep and Plg (after the PETM). The short-term variations concern massive influxes of one or more clay minerals, probably related to a combination of eustatic, tectonic or/an…		High resolution sampling allows to describe accurately the short term pattern of mineralogical variations in the PETM interval	28
57, c, m	δ13C (carbonates in soil nodules)	Spain (Pyrenees) - Mudstone-dominated alluvial succession with abundant paleosols, divided into 4 PETM units. The basal conglomerate unit probably corresponds to the main shift of δ13C (not measurable)	<2µm	clay assemblage	A slight pulse of Kln in the lower part of the PETM, then Kln gradually decreases toward pre-PETM values		Sme and Ilt dominates the succession and generally change in opposite manner; the Kln pulse marks a decrease of Ilt and slight Chl increase; a Sme pulse occurs in the central part of the PETM, with the lighest δ13C values		Pedogenic calcite nodules occur in the PETM paleosols of the area and such nodules do not form in the types of humid, annually wet tropical soils in which Kln typically forms	The pulse of in Kln (and Chl) during the initial PETM most likely reflects deeper physical erosion and a change in the source of clay minerals. Deeper erosion led to an increase in Kln from buried Mesozoic soils, where Kln formed in an earlier tropical setting			57
58, m	biostratigraphy	Austria - Flysch deposits, only hemipelagites sampled for clay mineral analyses (with low resolution). Volcanoclastic materials tens of metres above the PETM	bulk, <2µm	clay assemblage, (Ilt+cho)/(Kln+Sme)	The highest value of Kln occurs approximately 80 m below the CIE (Kln pulse), but in the first 2 m of hemipelagic shale above the CIE Kln is still detectable		Kln increases with Ilt, whereas Sme decreases. Chl occurs at trace levels			Higher values of Kln usually correlate with higher values of Ilt and mica (typical erosional components). So it is likely that the timing and magnitude of Kln transport was influenced by tectonic or eustatic factors. Nevertheless, there was enough Kln at the land surface to give a signal in the Thanetian sea, so, this Kln was formed not long before its deposition because the strong erosion during…			58
59, m	δ13C, δ18O, biostratigraphy	Spain (Pyrenees) - Ermua base-of-slope apron environment (Ermua) and basinal setting (Zumaia).		a revised interpretation is proposed for previous published materials	Joint increase of Chl and Kln					Previous interpretation ascribed mixed associations (Kln and Chl) to arid conditions in the adjacent areas (Chl) and Kln brought from lower latitudes by oceanic currents. However, the observed Kln and Chl increase is associated with decreased siliciclastic grain size, and probably increased sedimentation rates. This agrees with increased erosion of continents (including buried kaolinitic soils), …			59
33, m	biostratigraphy as main homogeneous key, but accounting also for detailed isotopic record in several sections	Thetys realm - Many sections from the Tethyan realm, examined reviewing data from several previous papers by the same research group	<2µm	clay assemblage, Kln/Sme	The different sections show variable arrangements; Kln increases strongly throughout most of the Tethys during the PETM, at some site the Kln increase shortly anticipate the isotopic shift		In the coastal basins along the southern margin (Israel and southern Tunisia), Kln disappears gradually giving way to Plg and Sep		Evaporite deposits	Local provenance factors are considered, for example as effect of regional uplift (North Sea area)	After considering sea-level fluctuation, possible local peculiarities and other factors influencing clay mineralogy, the clay mineral association observed agrees with an episode of humidity and warmth indicated by a strong increase in Kln in the Tethys region, even if with different time of exordium and duration; along the southern margin, warm and arid conditions are indicated by Sep and Plg occ…	The biostratigraphic tuning of the several sections examined enable to the find that the humid perennial episode characteristic of the PETM shifted from lower to higher latitudes leading to progressively more arid conditions during the early Eocene	33
60, m>c	biostratigraphy, however the PETM interval definition is problematic	New Jersey to Virginia - Several cores and outcrops with hiatuses and unconformities; inner and middle neritic depositional environments reflecting input from several river drainage systems	<2µm	Kln, clay assemblage	An intense pulse of Kln is detectable trough the various sections (i.e. different drainage systems), with rather uniform shape even if most of them are not complete		The ML dominate before and after the Kln pulse, accompanied by a parallel Ilt enrichment				The widespread coeval extent of a similar pattern of the Kln pulse does not supports a major contribution from the reworking of Cretaceous Kln deposits. The large Kln increase indicates a period of intensive weathering that formed highly Kln source soils for the entire embayment. The formation of pedogenic Kln in short time (tens of years) is reported under intensive, tropical conditions	The relatively high Ilt values coincident with the Kln pulse may reflect: i) the low amount of ML present, or ii) increased erosion of soils and poorly weathered parent rock in more elevated or high-relief source areas during increased precipitation.	60
												The relatively short time duration of the Kln pulse makes it useful for detailed correlation of the Paleocene-Eocene boundary
30, m	δ13C and δ18O (foraminifera), biostratigraphy, magnetostratigraphy	New Jersey to North Atlantic - Bass River borehole: very slightly sandy, slightly glauconitic silty gray clay which becomes a slightly silty greenish-gray clay upward. An unconformity at the top	<2µm	Kln/(ML+Ilt)	Kln content gradually rises to 34% and declines to pre-PETM values (< 2%) at the upper unconformity. Superimposed on the gradual rise, a sharp Kln pulse coincides with the stronger isotope shift	About 4 m above the PETM base (maximum Kln values), a broad Kln pulse is detectable	The clay assemblage consists primarily of Kln and ML (> 80 % Ilt), with a minor discrete Ilt (possibly). ML and Ilt are treated as a single ML component			The very abrupt increase Kln pulse at the PETM base should occur in < 20 ka, a time period considered too short for Kln formation in soils	The precise coincidence of the Kln peak with the C and O isotopic shifts and the lack of consistency between variations in Kln and sedimentologic parameters indicates a climatic control on Kln deposition at the PETM. Kln appears to be a climate signal related to increased temperature and/or precipitation. The mechanism for producing this climatic response has not yet been determined	Possible clay minerals fractionation due to the transportation distance and/or sorting mechanisms is also discussed	30
61, m	δ13C (Spain, Zumaia), tentative correlation (North Sea)	North Sea, Spain (Pyrenees) - North Sea: hemipelagites followed by more rapidly deposited muds and submarine fan sands (after sea-level fall); Spain: dominantly calcareous oceanic facies	clay minerals	Kln	Spain: a rapid incoming of Kln followed by a sharp pulse (75% Kln) coincide with minor and major δ13C shifts respectively (left figure at page 50). North Sea: a strong increase in Kln (from almost 0% to 65%) is recorded after a minor increase below						The contemporaneous rapid incoming of Kln and the isotopic shift (Spain) suggest a rapid oceanic warming followed by rapid terrestrial warming.	The occurrence of a major sea level fall approximately 10m below the Kln increase (North Sea) makes further complicated the interpretation of the Kln influx	61
											Although significant amount of Kln is likely related to climatic warming, numerical values should not be regarded as a climatic measure
23, m	biostratigraphy	North Sea - After a major sea-level fall, medium to dark grey, crudely laminated mudstone are gradually followed by dark laminated mudstone and by a turbidite sandstone unit. At the top a rapid transition to delicately laminated mudstone	clay assemblage	Kln	After a Kln-free assemblages (with Sme or Chl), Kln reaches a low peak (laminated grey mudstone), thereafter Kln increases rapidly, paralleling an overall increase in grain size		Before the Kln increase the assemblage was dominated by Sme or Chl, probably derived from alteration of fine-grained volcanic material			Variations in the relative abundance of Kln in the sandstone unit are clearly related to the grain-size, and cannot be taken as a direct climatic indicator	The occurrence of Kln is almost certainly an indicator of increased humidity in the source areas, as it is virtually absent from the underlying sediments, even in sandier facies lower in the section	A conclusive interpretation of the Kln influx is not available, but the absence of Kln reservoir seems to suggest a climatic effect	23
32, m	δ13C (organic), biostratigraphy	New Zealand - Massive calcareous siltone deposited at intermediate-water depth (500-1000m)	<2µm	clay assemblage, Sme/Ilt, Kln/Ilt, Kln/Sme	The increase in Kln/Ilt and Kln/Sme started more or less 3ka before the main isotopic shift; it occurs during a minor shift (not discussed as possible precursor event)	A broad pulse of Kln/Ilt and Kln/Sme occurs at the recovery base	The association is dominated by Sme; Kln and Ilt are well correlated				Major increases in Kln indicate increases in temperature and rainfall	A comparison between the Kln concentration of the studied sediments and modern oceanic ones is used to discuss possible paleotemperature variations	32
62, m	δ18O (foraminifera)	Antarctica - ODP site 690B (Maud Rise), nannofossil ooze	<2µm	clay assemblage, Kln/Ilt, Sme/Ilt, Kln/Sme	A pulse of Kln/Ilt is synchronous with the isotopes shift	A large increase in Kln (up to 30%) is coeval with higher Ilt (associated with Chl and ML) at the expense of Sme (see also [35])	Sme dominates the assemblage, small percentages of Ilt occur throughout the sequence, episodically associated with Chl and ML.				The pulse of Kln/Sme is inferred to represent a year-round increase in rainfall. It was followed by increases in Sme/Ilt and Kln/Ilt, indicative of increased chemical weathering. (Kln in tropical soils can develop in <50 y). The Kln formation during the recovery requires warm summer temperatures and could be enhanced by an increase in rainfall. Intensified rainfall would also have increased erosi…	A possible origin on the clay association due to increased erosion due to higher precipitation and run-off is discussed, but excluded because a diversified clay assemblage would have been deposited offshore, as in modern warm and temperate humid climates	62
							The Kln/Ilt pulse at the PETM onset is parallel to Sme/Ilt
38, m	δ18O foraminifera (Antartic), biostratigraphy (Angola)	Antarctica and Angola Basin - ODP site 690B (Antarctica, Maud Rise), nannofossil ooze; DSDP Site 530 (Angola), alternance of mudstones, marlstones and chalks, without indication of reworking; the sampling resolution is low. Many other sites have been considered, even if accurate position of the PETM is critical	<2µm	Kln/Ilt, Sme/Kln, Kln, Plg, Sep, Sme/Plgy	Site 690: the Kln increases from trace amount to 20% when the δ18O of planktonic foraminifera reached its lightest values. At site 530 a prominent pulse of Plg is correlated with the Kln pulse at the PETM onset of site 690		Site 692: the clay assemblage is dominated by Sme, with Kln, Ilt (traces of other minerals)				Site 690: the Kln contents mainly rely on climate, and suggests that warmer conditions have been associated with increased humidity onshore. Site 530: the Plg abundance and correlation with O isotope lightning is interpreted as warmer conditions associated with a major seasonal aridity in coastal areas,	From the late Paleocene to the middle Eocene, the absence of geodynamic events and eustatic variations compatible with clay mineral evolution and the good correlation between mineralogical and δ18O data indicate that the clay mineral (pedo)genesis is mainly driven by climate. In particular warmer conditions were associated with enhanced evaporation at low to middle latitudes, and increased precip…	38
							Site 530: the clay assemblage is dominated by Sme, with Chl, Ilt and ML; Plg temporarily dominates (up to 75%) at the Paleocene-Eocene time boundary
37, m	δ13C carbonates, biostratigraphy	Spain (Pyrenees) - Pelagic and turbiditic deposits, only pelagic sediments sampled for analyses	<2µm	Kln/Sme, Sme/Ilt	A few metres below the lowest isotope value (approximately 325ka), Kln starts to increase and a further brief intense pulse (up to 75%) occur with the lightest isotope values; Kln is also systematically correlated with the occurrence of red pelagic limestones and marlstones		Ilt, Chl and Sme account for approximately 40–100% of the mineral assemblage, Kln is present in the early Paleocene and in the latest Paleocene to earliest Eocene				Changes in the clay-mineral associations do not relate to changes in parent-rock composition, but rather to climatic variations in weathering and soil formation. The uncommonly high Kln/Sme indicates very warm and humid climatic conditions providing high quantities of marine suspension because of strong chemical weathering combined with high precipitation and increased continental runoff rates	Interferences obscuring the climatic signal of the clay minerals are considered, such as provenance change desumed by siliciclastic sand composition (turbidites), tectonism and eustatic changes. A peculiar confounding mechanism is the Kln retention on the shelf (possible during high sea level). However, the Kln variation does not show regular cycling, following possible third-order transgressive …	37
